# Supplementary material for: A recurrent cancer-associated substitution in DNA polymerase ε produces a hyperactive enzyme
Source: PubMed Central journal article supplement (PMC6343027; doi:10.1038/s41467-018-08145-2), 2019-01-22
Supplement: 41467_2018_8145_MOESM1_ESM.pdf [file 41467_2018_8145_MOESM1_ESM.pdf]

SUPPLEMENTARY MATERIAL

**A recurrent cancer-associated substitution in DNA polymerase  $\epsilon$  produces a hyperactive enzyme**

Xing et al.

## SUPPLEMENTARY METHODS

### Active site titration

We used a modification of the previously described procedure<sup>1</sup> to compare the fraction of active polymerase in the preparations of wild-type Pol $\epsilon$ , exo<sup>-</sup> Pol $\epsilon$  and Pol $\epsilon$ -P301R. For each reaction, a 7- $\mu$ l mixture of Cy5-labelled P50/T80 substrate, dNTPs, and Pol $\epsilon$  in the reaction buffer was first incubated at 30°C for 5 min to form DNA-Pol $\epsilon$  complex. A 5- $\mu$ l mixture of single-stranded M13mp2 DNA and MgAc<sub>2</sub> was then added, and DNA synthesis was allowed to proceed for 10 min at 30°C. The single-stranded M13mp2 DNA acts as a trap to capture any dissociating Pol $\epsilon$  molecules and ensure single-hit conditions of the polymerase reaction<sup>2</sup>. The final 12- $\mu$ l reactions contained 33 mM Tris-HCl pH 7.8, 0.8 mM dithiothreitol, 0.17 mg/ml bovine serum albumin, 8 mM MgAc<sub>2</sub>, 104 mM NaAc, 83 nM Cy5-labelled P50/T80, 830 nM single-stranded M13mp2, dNTPs at the intracellular S-phase concentrations (30  $\mu$ M dCTP, 80  $\mu$ M dTTP, 38  $\mu$ M dATP, and 26  $\mu$ M dGTP) and Pol $\epsilon$  at increasing concentrations as indicated. To confirm that polymerase could not re-associate with the P50/T80 substrate under these conditions, a control reaction was performed as follows. The single-stranded M13mp2 was preincubated with Pol $\epsilon$  and dNTPs in the reaction buffer at 30°C for 5 min in a 9- $\mu$ l reaction, and a 3- $\mu$ l mixture of Cy5-labelled P50/T80 substrate and MgAc<sub>2</sub> was then added, followed by incubation at 30°C for 10 min. The absence of detectable DNA synthesis in the control reaction confirmed efficient trapping of free Pol $\epsilon$  molecules. The reactions were quenched by the addition of an equal volume of 2x loading buffer containing 95% deionized formamide, 100 mM EDTA, and 0.025% Orange G. After

boiling for 3 min and cooling on ice, 6- $\mu$ l samples were subjected to electrophoresis in 10% denaturing polyacrylamide gel containing 8 M urea in 1x TBE. Quantification was done by fluorescence imaging on a Typhoon system (GE Healthcare).

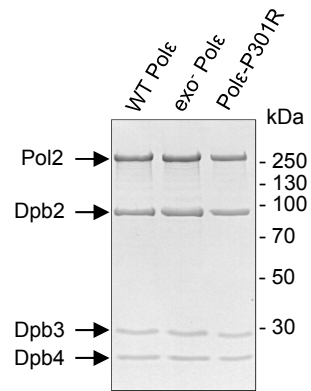

**Supplementary Figure 1. SDS PAGE analysis of purified wild-type Pol $\epsilon$ , proofreading-deficient Pol $\epsilon$  and Pol $\epsilon$ -P301R.** The proteins (5  $\mu$ g in each lane) were separated in a 4-12% Bis-Tris gel and visualized by Coomassie staining. WT Pol $\epsilon$ , wild-type Pol $\epsilon$ . exo- Pol $\epsilon$ , proofreading-deficient Pol $\epsilon$ . Uncropped gel image is provided in a Source Data file.



**a**

P50/T80 5' Cy5-TGGAACCTTTGTACGTCCAAAATTGAATGACTTGGCCAACACTACACTAAGTT  
3' ACCTTGAAACATGCAGGTTTTAACTTACTGAACCGGTTGATGTGATTCAAGGTCCCCTTTCACTATGCTATTCTTTGG

P51T/T80 5' Cy5-TGGAACCTTTGTACGTCCAAAATTGAATGACTTGGCCAACACTACACTAAGTT<sup>T</sup>  
3' ACCTTGAAACATGCAGGTTTTAACTTACTGAACCGGTTGATGTGATTCAAGGTCCCCTTTCACTATGCTATTCTTTGG

P52iT/T80 5' Cy5-TGGAACCTTTGTACGTCCAAAATTGAATGACTTGGCCAACACTACACTAAGTT<sup>T</sup>C  
3' ACCTTGAAACATGCAGGTTTTAACTTACTGAACCGGTTGATGTGATTCAAGGTCCCCTTTCACTATGCTATTCTTTGG

P53iT/T80 5' Cy5-TGGAACCTTTGTACGTCCAAAATTGAATGACTTGGCCAACACTACACTAAGTT<sup>T</sup>CA  
3' ACCTTGAAACATGCAGGTTTTAACTTACTGAACCGGTTGATGTGATTCAAGGTCCCCTTTCACTATGCTATTCTTTGG

P54iT/T80 5' Cy5-TGGAACCTTTGTACGTCCAAAATTGAATGACTTGGCCAACACTACACTAAGTT<sup>T</sup>CAG  
3' ACCTTGAAACATGCAGGTTTTAACTTACTGAACCGGTTGATGTGATTCAAGGTCCCCTTTCACTATGCTATTCTTTGG

P55iT/T80 5' Cy5-TGGAACCTTTGTACGTCCAAAATTGAATGACTTGGCCAACACTACACTAAGTT<sup>T</sup>CAGG  
3' ACCTTGAAACATGCAGGTTTTAACTTACTGAACCGGTTGATGTGATTCAAGGTCCCCTTTCACTATGCTATTCTTTGG

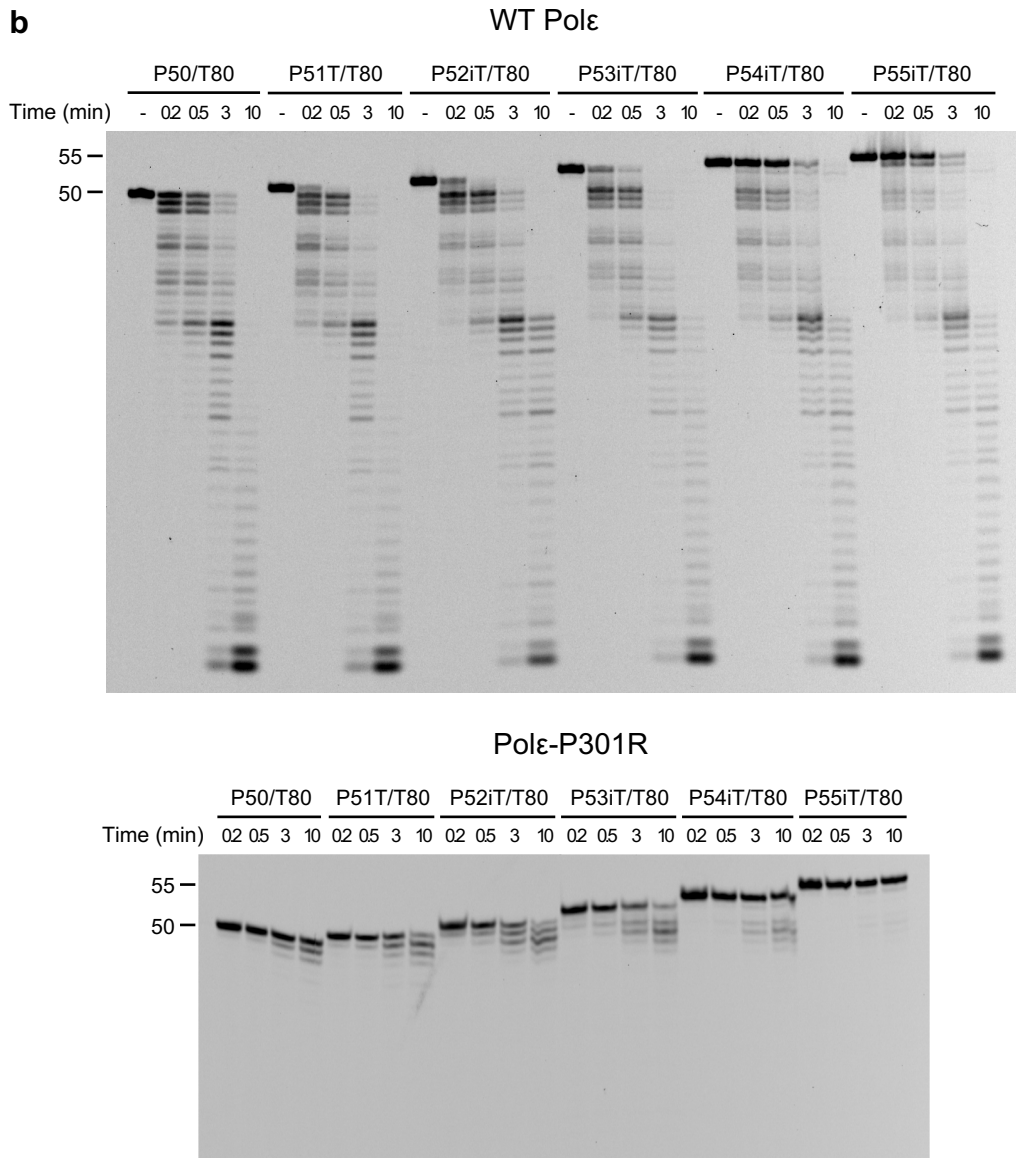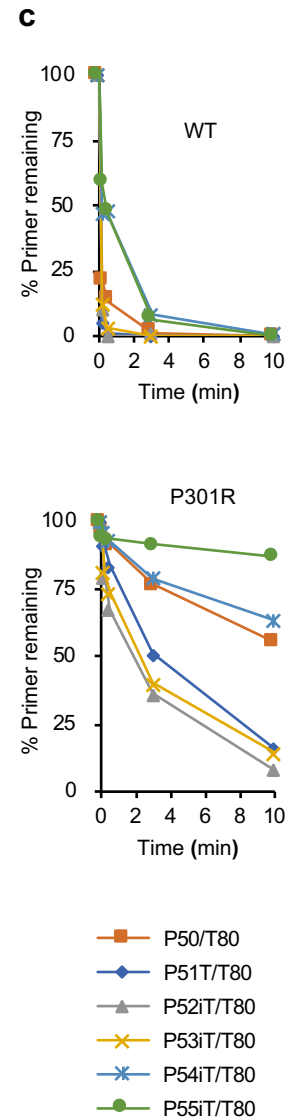

**Supplementary Figure 2. Exonuclease activity of wild-type Polε (WT) and Polε-P301R on matched and mismatched DNA.** (a) DNA substrates. The mismatched base is in red. (b) Exonuclease activity was assayed as in Fig. 1a. (c) Quantification of (b). The activity of both enzymes is maximal when a mismatch is present within 3 bp from the 3' end. Reduced activity with P54iT/T80 and P55iT/T80 in comparison with P50/T80 likely reflects a stabilizing effect of terminal G-C pairs that are not present in P50/T80. Representative of three independent experiments. Source data for (b) and (c) are provided in a Source Data file.

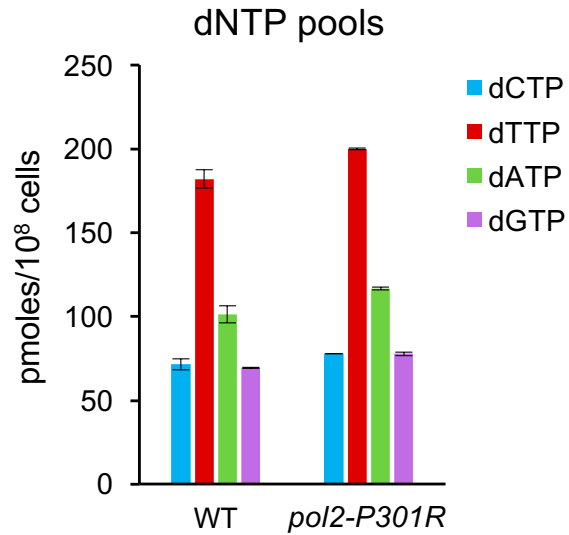

**Supplementary Figure 3. Intracellular dNTP levels in wild-type and *pol2-P301R* strains.** The dNTP concentrations were measured in asynchronous logarithmic phase cultures as described previously<sup>17</sup>. Data are presented as the mean for two independent measurements performed with the wild-type strain and two independent *pol2-P301R* isolates. Error bars show the range of values. Source data are provided in a Source Data file.

**a**  $\text{exo}^- \text{Pol}\epsilon$

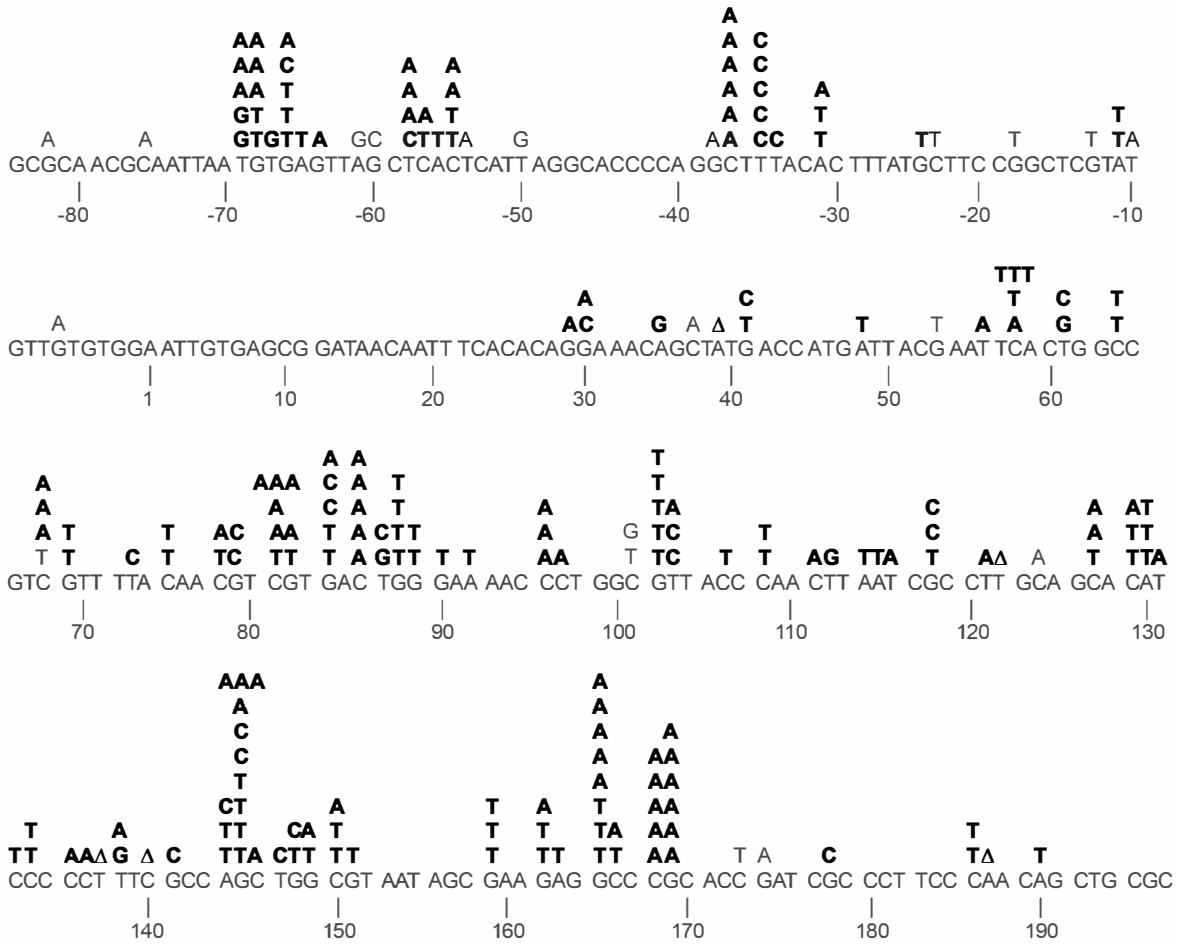

**Supplementary Figure 4. (continued)**

**b Polε-P301R**

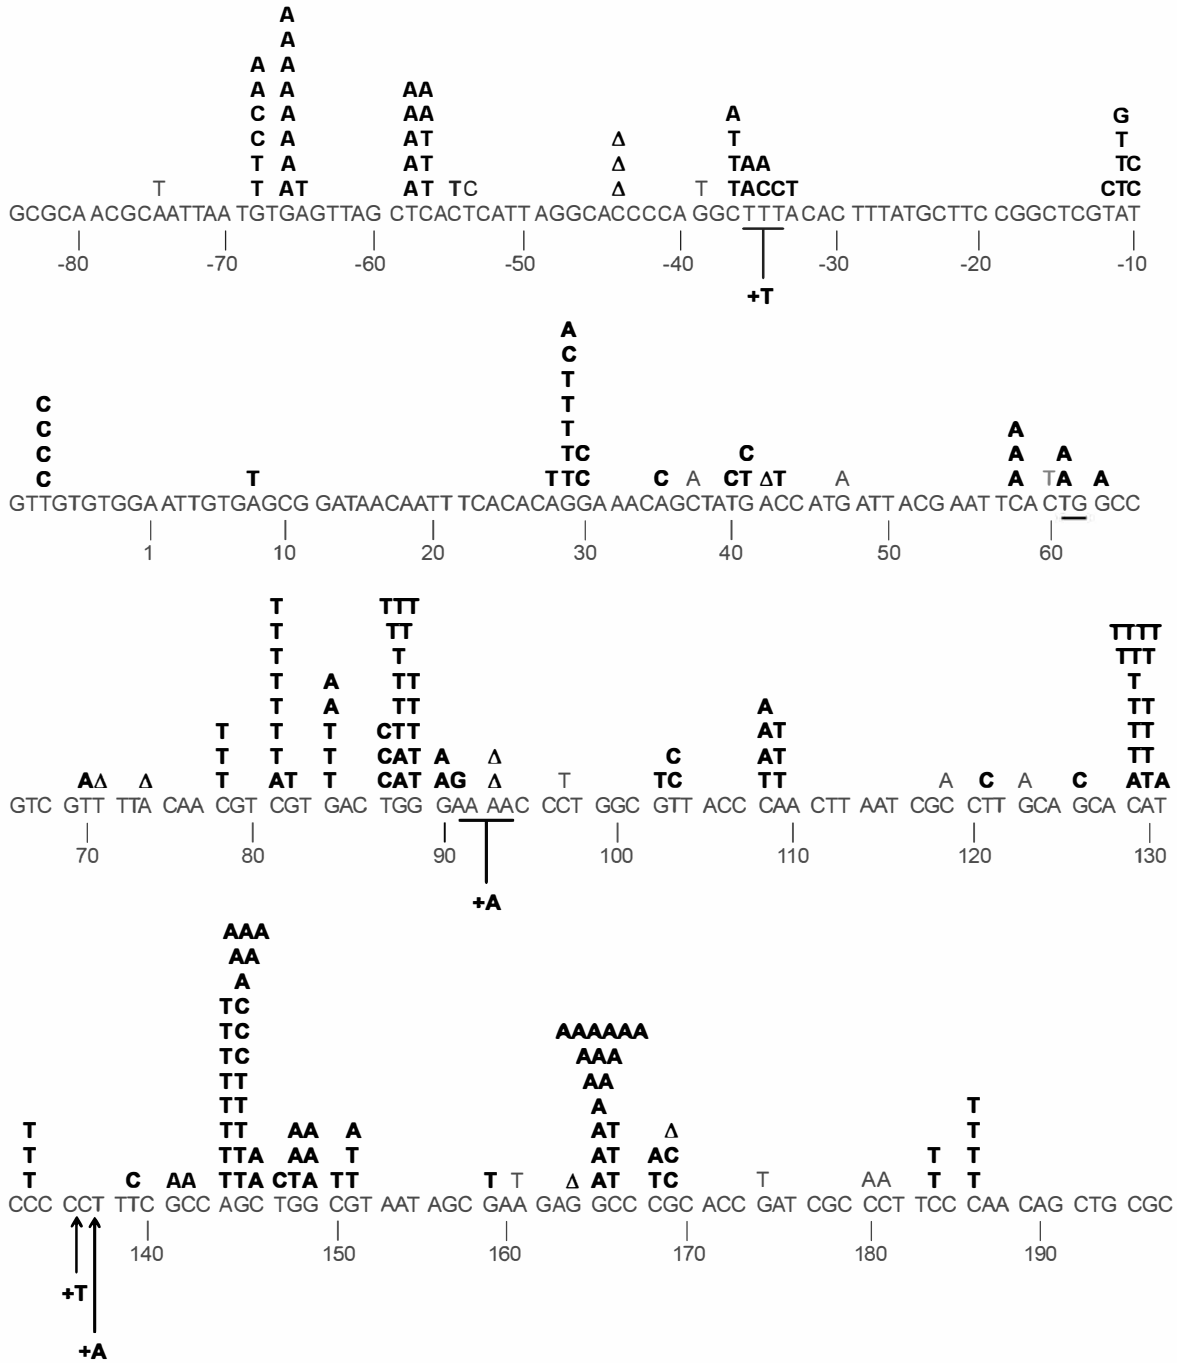

**Supplementary Figure 4. Spectra of single-base substitutions and insertion/deletion mutations generated by exo<sup>-</sup> Polε (a) and Polε-P301R (b) in the *lacZ* gene.** Base substitutions and single-base deletions (open triangles) are shown above the *lacZ* sequence. Insertions are under the *lacZ* sequence. Deletion of two base pairs is shown as a line under the *lacZ* sequence. Detectable mutations are in black, bold text. Silent mutations are in plain, gray text.

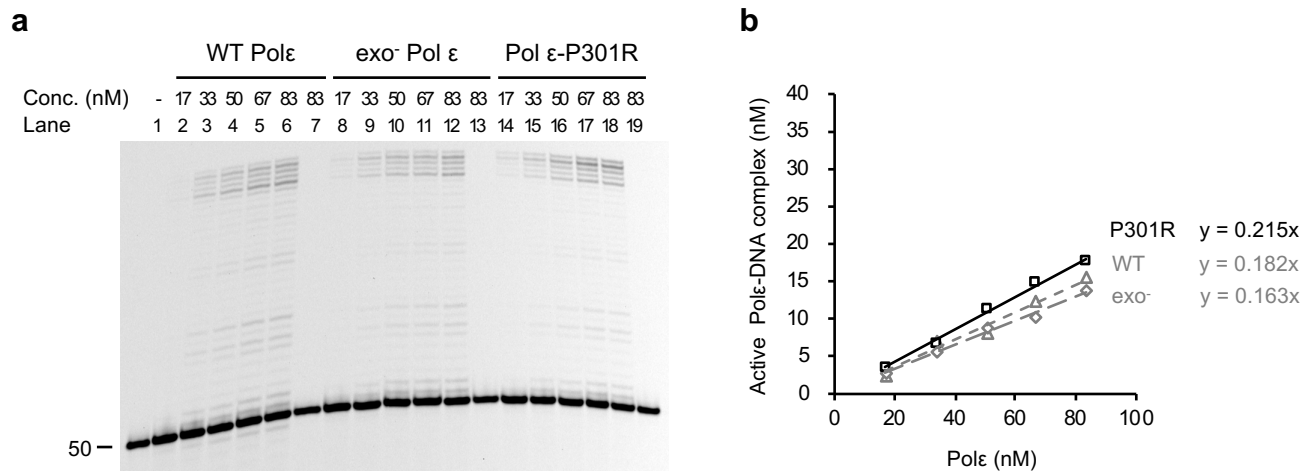

**Supplementary Figure 5. Active site titration of wild-type (WT) Polε, exo<sup>-</sup> Polε and Polε-P301R.**

(a) Lanes 2-6, 8-12 and 14-18: Polε variants (0.2 – 1 pmol) were incubated with 1 pmol of Cy5-labelled P50/T80 and dNTP at 30°C for 5 min to form DNA-Polε-dNTP ternary complex, and MgAc<sub>2</sub> was then added along with 10 pmol of single-stranded M13mp2 trap to allow primer extension under single-hit conditions. Negative controls in lanes 7, 13 and 19 confirmed the effectiveness of M13mp2 trap: 1 pmol of Polε was incubated with 10 pmol M13mp2 prior to the addition of MgAc<sub>2</sub> and Cy5-labelled P50/T80, and no extension of the Cy5-labeled primer was observed. Lane 1: P50/T80 DNA substrate alone. See Supplementary Methods for details. (b) Quantification of active fraction of Polε variants. The concentration of active Polε-DNA complexes plotted on the Y axis was calculated by multiplying the fraction of extended primer by the total P50/T80 concentration in the reaction. The concentration of Polε present in the reaction is plotted along the X axis. The slope of the line shows the active fraction of the protein preparations. Note that this represents a minimum estimate of the active enzyme fraction, since some molecules could dissociate before engaging in DNA synthesis. While the active fractions are generally similar between wild-type Polε, exo<sup>-</sup> Polε and Polε-P301R preparations, a slightly higher estimate for Polε-P301R could conceivably reflect its reduced propensity to dissociate predicted by our model (Fig. 6). Representative of three independent experiments. Source data are provided in a Source Data file.

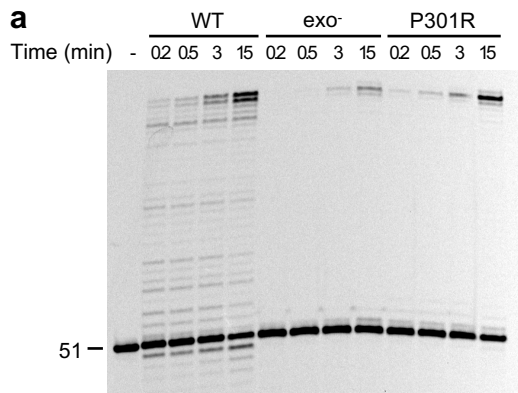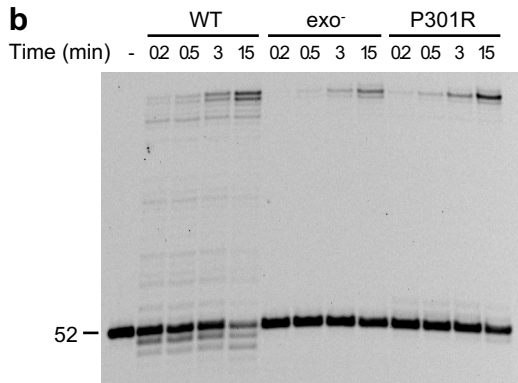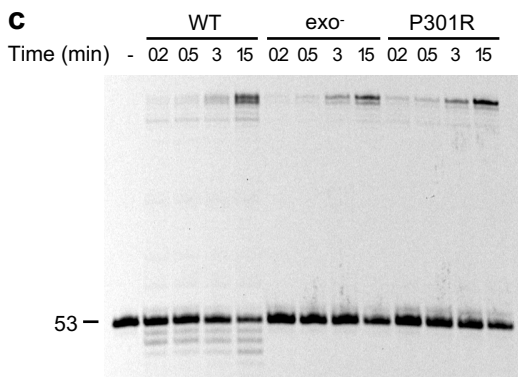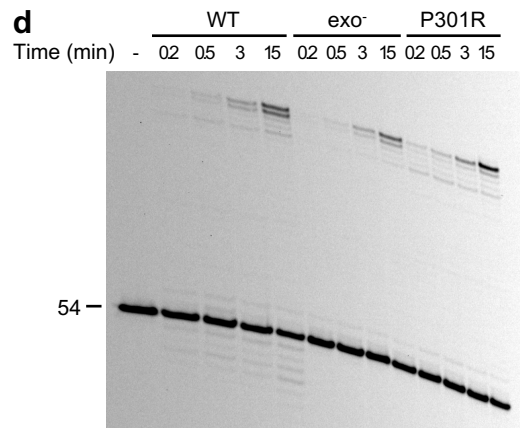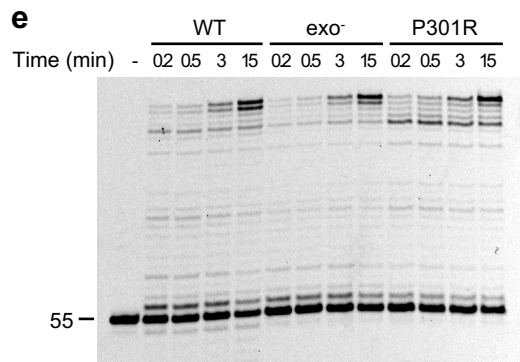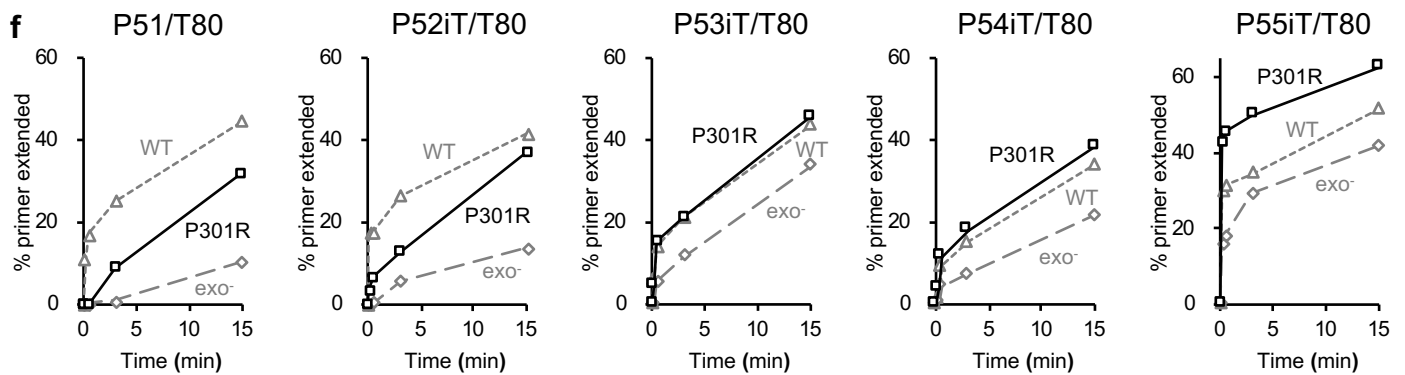

**Supplementary Figure 6. Extension of primers with terminal and internal mismatches by wild-type Polε (WT), exo<sup>-</sup> Polε and Polε-P301R.** The mismatched substrates are described in Supplementary Fig. 2a. Polymerase activity was assayed as in Fig. 4a with 0.8 nM Polε and 25 nM P51T/T80 (a), P52i/T80 (b), P53i/T80 (c), P54i/T80 (d) and P55i/T80 (e). (f) Quantification of (a-e). Each panel is representative of two to seven experiments. Source data are provided in a Source Data file.

**Supplementary Table 1. Fidelity of *in vitro* DNA synthesis by *exo*<sup>-</sup> Polε and Polε-P301R.**

|                              | <i>exo</i> <sup>-</sup> Polε |                                         | Polε-P301R |                                         |
|------------------------------|------------------------------|-----------------------------------------|------------|-----------------------------------------|
|                              | No.                          | ER<br>( $\times 10^{-6}$ ) <sup>a</sup> | No.        | ER<br>( $\times 10^{-6}$ ) <sup>a</sup> |
| Base substitutions           | 200                          | 155                                     | 208        | 59                                      |
| Transitions                  | 69                           | 144                                     | 110        | 84                                      |
| A→G (A-dCTP)                 | 1                            | 8.5                                     | 2          | 6.2                                     |
| G→A (G-dTTP)                 | 26                           | 236                                     | 46         | 153                                     |
| C→T (C-dATP)                 | 29                           | 239                                     | 44         | 133                                     |
| T→C (T-dGTP)                 | 13                           | 101                                     | 18         | 51                                      |
| Transversions                | 131                          | 162                                     | 98         | 44                                      |
| A→C (A-dGTP)                 | 1                            | 11                                      | 1          | 4.0                                     |
| A→T (A-dATP)                 | 15                           | 110                                     | 22         | 59                                      |
| C→A (C-dTTP)                 | 42                           | 357                                     | 15         | 47                                      |
| C→G (C-dCTP)                 | 0                            | <15                                     | 0          | <5.7                                    |
| G→C (G-dGTP)                 | 14                           | 127                                     | 12         | 40                                      |
| G→T (G-dATP)                 | 40                           | 351                                     | 36         | 116                                     |
| T→A (T-dTTP)                 | 12                           | 150                                     | 12         | 55                                      |
| T→G (T-dCTP)                 | 7                            | 74                                      | 0          | <3.9                                    |
| Single-base indels           | 5                            | 3.2                                     | 15         | 3.3                                     |
| Minus 1                      | 5                            | 6.5                                     | 10         | 4.8                                     |
| Plus 1                       | 0                            | <1.3                                    | 4          | 1.9                                     |
| Other                        |                              |                                         | 1          |                                         |
| Total                        | 205                          |                                         | 222        |                                         |
| <i>lacZ</i> mutant frequency |                              | 0.032                                   |            | 0.012                                   |

The data are based on analysis of 205 and 212 *lacZ* mutants created by *exo*<sup>-</sup> Polε and Polε-P301R, respectively. 21 of 205 mutants created by *exo*<sup>-</sup> Polε contained more than one mutation, and 21 of 212 mutants created by Polε-P301R contained more than one mutation. Only phenotypically detectable *lacZ* mutations are listed. The location of individual mutations in the *lacZ* sequence is shown in Supplementary Fig. 4. The background mutant frequency for unfilled M13mp2 gapped substrate was 0.00062.

<sup>a</sup>Error rates (ER) for individual mutation types were calculated as described in Methods. Silent mutations were excluded from the ER calculation.

**Supplementary Table 2. Spontaneous *can1* mutations in *pol2-P301R* yeast strain.**

| Mutation           | No. of detectable mutations |
|--------------------|-----------------------------|
| Base substitutions |                             |
| GC to AT           | 60                          |
| GC to TA           | 49                          |
| GC to CG           | 1                           |
| AT to GC           | 10                          |
| AT to CG           | 4                           |
| TA to TA           | 21                          |
| Single-base indels |                             |
| Minus 1            | 9                           |
| Plus 1             | 45                          |
| Total              | 199                         |

The data are based on DNA sequence analysis of 194 *Can<sup>r</sup>* mutants containing a total of 199 mutations in the *CAN1* gene.



## SUPPLEMENTARY REFERENCES

1. Cai, H., Yu, H., McEntee, K., Kunkel, T.A. & Goodman, M.F. Purification and properties of wild-type and exonuclease-deficient DNA polymerase II from *Escherichia coli*. *J Biol Chem* **270**, 15327-35 (1995).
2. Maki, S., Hashimoto, K., Ohara, T. & Sugino, A. DNA polymerase II ( $\epsilon$ ) of *Saccharomyces cerevisiae* dissociates from the DNA template by sensing single-stranded DNA. *J Biol Chem* **273**, 21332-41 (1998).
3. Mertz, T.M., Sharma, S., Chabes, A. & Shcherbakova, P.V. Colon cancer-associated mutator DNA polymerase  $\delta$  variant causes expansion of dNTP pools increasing its own infidelity. *Proc Natl Acad Sci USA* **112**, E2467-76 (2015).
